# Supplementary material
Source: publisher figshare collection journal article supplement (https://rs.figshare.com/ndownloader/files/40854544)
Supplement: Supplementary file 1 [file 40854544]

species	offspring_ID	mother_ID	father_ID	mother_community	father_community	offspring_sex	number_maximally_tumescent_females	number_males	father_ordinal_rank	extra_community_paternity	for_which_analysis	NOTE
chimpanzee	DL	DM	BE	Kasekela	Kasekela	female	4	12	8	no	all
chimpanzee	GD	GM	AL	Kasekela	Kasekela	male	8	10	5	no	all
chimpanzee	TG	PI	GB	Kasekela	Kasekela	female	5	11	1	no	all
chimpanzee	FO	FF	WL	Kasekela	Kasekela	male	8	11	7	no	all
chimpanzee	JK	JF	AL	Kasekela	Kasekela	male	3	11	3	no	all
chimpanzee	SR	SA	BE	Kasekela	Kasekela	female	8	12	9	no	all
chimpanzee	CN	CD	WL	Kasekela	Kasekela	female	8	12	1	no	all
chimpanzee	SI	SW	WL	Kasekela	Kasekela	female	9	12	1	no	all
chimpanzee	FE	FF	EV	Kasekela	Kasekela	male	5	11	2	no	all
chimpanzee	GA	GM	WL	Kasekela	Kasekela	female	4	12	1	no	all
chimpanzee	ZS	TZ	FR	Kasekela	Kasekela	male	5	11	5	no	all
chimpanzee	TN	PI	FR	Kasekela	Kasekela	male	6	12	4	no	all
chimpanzee	SN	SA	AO	Kasekela	Kasekela	male	7	12	11	no	all
chimpanzee	FI	FF	FR	Kasekela	Kasekela	male	8	12	3	no	all
chimpanzee	FU	FN	SL	Kasekela	Kasekela	male	4	12	11	no	all
chimpanzee	GLI	GM	FR	Kasekela	Kasekela	female	9	12	2	no	all
chimpanzee	FLI	FF	KS	Kasekela	Kasekela	female	8	12	12	no	all
chimpanzee	YAM	YD	WL	Kasekela	Kasekela	female	8	12	7	no	all
chimpanzee	TZN	PI	FR	Kasekela	Kasekela	male	10	11	1	no	all
chimpanzee	ZEL	TZ	KS	Kasekela	Kasekela	female	9	11	9	no	all
chimpanzee	FND	FN	SL	Kasekela	Kasekela	male	10	13	10	no	all
chimpanzee	TOF	TTA	SL	Kasekela	Kasekela	male	6	11	6	no	all
chimpanzee	TOM	TG	KS	Kasekela	Kasekela	male	3	11	10	no	all
chimpanzee	SDB	SW	FR	Kasekela	Kasekela	male	6	11	1	no	all
chimpanzee	SAM	SA	FR	Kasekela	Kasekela	female	6	11	1	no	all
chimpanzee	GIM	GM	TB	Kasekela	Kasekela	male	11	11	5	no	all
chimpanzee	MAM	MAK	GL	Kasekela	Kasekela	female	12	11	8	no	all
chimpanzee	FAM	FN	SL	Kasekela	Kasekela	female	15	11	1	no	all
chimpanzee	COC	CD	FD	Kasekela	Kasekela	female	11	11	4	no	all
chimpanzee	SHA	SR	WL	Kasekela	Kasekela	male	10	11	5	no	all
chimpanzee	KEA	KP	WL	Kasekela	Kasekela	female	9	12	6	no	all
chimpanzee	ZIN	TZ	GL	Kasekela	Kasekela	male	11	12	6	no	all
chimpanzee	BRZ	BAH	KS	Kasekela	Kasekela	male	9	12	4	no	all
chimpanzee	DIA	DL	FO	Kasekela	Kasekela	female	9	12	9	no	all
chimpanzee	TAB	TG	FE	Kasekela	Kasekela	female	5	12	12	no	all
chimpanzee	SIR	SA	AO	Kasekela	Kasekela	male	11	12	7	no	all
chimpanzee	ERI	EZA	KS	Kasekela	Kasekela	male	6	13	1	no	all
chimpanzee	FAD	FN	WL	Kasekela	Kasekela	female	6	13	10	no	all
chimpanzee	GAB2	GA	AO	Kasekela	Kasekela	male	4	13	7	no	all
chimpanzee	SAF	SI	AO	Kasekela	Kasekela	female	10	13	7	no	all
chimpanzee	IPO	IMA	WL	Kasekela	Kasekela	male	1	13	4	no	all
chimpanzee	GGL	GA	FO	Kasekela	Kasekela	male	8	13	3	no	all
chimpanzee	GIZ	GM	FE	Kasekela	Kasekela	male	5	13	1	no	all
chimpanzee	FFT	FN	WL	Kasekela	Kasekela	male	7	14	5	no	all
chimpanzee	BAS	BAH	TN	Kasekela	Kasekela	female	7	14	10	no	all
chimpanzee	NYO	NUR	FU	Kasekela	Kasekela	male	7	14	12	no	all
chimpanzee	GLIB1	GLI	SL	Kasekela	Kasekela	female	4	14	6	no	all
chimpanzee	DUK	DL	TN	Kasekela	Kasekela	male	7	14	10	no	all
chimpanzee	GLA	GLD	FU	Kasekela	Kasekela	female	7	14	13	no	all
chimpanzee	GOS	GLI	FND	Kasekela	Kasekela	female	7	15	15	no	all
chimpanzee	EZAB1	EZA	TN	Kasekela	Kasekela	female	6	15	6	no	all
chimpanzee	TAR	TG	SL	Kasekela	Kasekela	female	5	15	3	no	all
chimpanzee	SHW	SI	TN	Kasekela	Kasekela	male	4	15	6	no	all
chimpanzee	GRE	GM	FE	Kasekela	Kasekela	male	9	11	1	no	all
chimpanzee	ESP	EZA	SL	Kasekela	Kasekela	female	8	11	5	no	all
chimpanzee	GAB	GA	FO	Kasekela	Kasekela	male	9	11	2	no	all
chimpanzee	BAL	BAH	FE	Kasekela	Kasekela	male	9	11	1	no	all
chimpanzee	FIC	FN	SDB	Kasekela	Kasekela	female	9	11	10	no	all
chimpanzee	MAU	MKW	FE	Kasekela	Kasekela	female	8	9	1	no	all
chimpanzee	TUR	TG	SL	Kasekela	Kasekela	female	7	9	3	no	all
chimpanzee	GHU	GLD	FE	Kasekela	Kasekela	female	5	9	1	no	all
chimpanzee	APL	AP	VIN	Mitumba	Mitumba	male	2	5	2	no	all
chimpanzee	FAN	FS	VIN	Mitumba	Mitumba	male	3	5	1	no	all
chimpanzee	EDE	EVA	VIN	Mitumba	Mitumba	female	2	3	1	no	all
chimpanzee	AND	AP	EDG	Mitumba	Mitumba	female	2	3	3	no	all
chimpanzee	FLW	FS	RUD	Mitumba	Mitumba	female	3	3	2	no	all
chimpanzee	LOS	LOR	RUD	Mitumba	Mitumba	female	4	2	1	no	all
chimpanzee	MAY	DB	RUD	Mitumba	Mitumba	female	3	2	1	no	all
chimpanzee	ARI	AP	RUD	Mitumba	Mitumba	male	3	2	1	no	all
chimpanzee	LTT	LUC	EDG	Mitumba	Mitumba	male	2	2	2	no	all
chimpanzee	KOM	KON	RUD	Mitumba	Mitumba	male	4	2	1	no	all
chimpanzee	MIS	MGA	EDG	Mitumba	Mitumba	female	2	4	3	no	all
chimpanzee	FAL	FS	EDG	Mitumba	Mitumba	female	2	4	1	no	all
chimpanzee	FED	FS	EDG	Mitumba	Mitumba	male	7	6	1	no	all
chimpanzee	KGA	KON	EDG	Mitumba	Mitumba	female	2	8	1	no	all
chimpanzee	BIB	BIM	EDG	Mitumba	Mitumba	female	3	7	1	no	all
chimpanzee	AMA	AP	EDG	Mitumba	Mitumba	male	2	7	1	no	all
bonobo	1	21	39	Ekalakala	Ekalakala	female	NA	NA	NA	no	offspring sired per male per year	no data on demography and dominance rank
bonobo	2	22	39	Ekalakala	Ekalakala	female	NA	NA	NA	no	offspring sired per male per year	no data on demography and dominance rank
bonobo	3	23	39	Ekalakala	Ekalakala	female	NA	3	2	no	all but PoA	incomplete data on maximally tumescent females
bonobo	4	22	39	Ekalakala	Ekalakala	female	7	3	1	no	all
bonobo	5	21	39	Ekalakala	Ekalakala	male	6	3	1	no	all
bonobo	6	24	40	Ekalakala	Ekalakala	female	6	3	3	no	all
bonobo	7	25	41	Ekalakala	Kokoalongo	male	NA	3	1	yes	offspring sired per male per year	incomplete data on maximally tumescent females
bonobo	8	26	42	Ekalakala	Ekalakala	female	NA	3	3	no	all but PoA	incomplete data on maximally tumescent females
bonobo	9	27	43	Kokoalongo	Kokoalongo	male	NA	8	1	no	all but PoA	incomplete data on maximally tumescent females
bonobo	10	28	41	Kokoalongo	Kokoalongo	male	NA	8	6	no	all but PoA	incomplete data on maximally tumescent females
bonobo	11	29	44	Kokoalongo	Kokoalongo	female	NA	8	7	no	all but PoA	incomplete data on maximally tumescent females
bonobo	12	30	43	Kokoalongo	Kokoalongo	male	4	10	1	no	all
bonobo	13	31	43	Kokoalongo	Kokoalongo	female	11	10	1	no	all
bonobo	14	32	43	Kokoalongo	Kokoalongo	male	12	10	1	no	all
bonobo	15	33	41	Kokoalongo	Kokoalongo	female	11	10	8	no	all
bonobo	16	34	43	Kokoalongo	Kokoalongo	female	11	10	1	no	all
bonobo	17	35	39	Kokoalongo	Ekalakala	female	10	9	1	yes	offspring sired per male per year
bonobo	18	36	39	Kokoalongo	Ekalakala	female	11	9	1	yes	offspring sired per male per year
bonobo	19	37	39	Kokoalongo	Ekalakala	female	11	9	1	yes	offspring sired per male per year
bonobo	20	38	39	Fekako	Ekalakala	female	NA	NA	1	yes	offspring sired per male per year
